# Supplementary material for: Accessible and sustainable Cu(0)-mediated radical polymerisation for the functionalisation of surfaces
Source: Royal Society of Chemistry journal article supplement (doi:10.1039/d0py00516a), 2020-01-01
Supplement: d0py00516a1.pdf [file d0py00516a1.pdf]

### Supplementary information

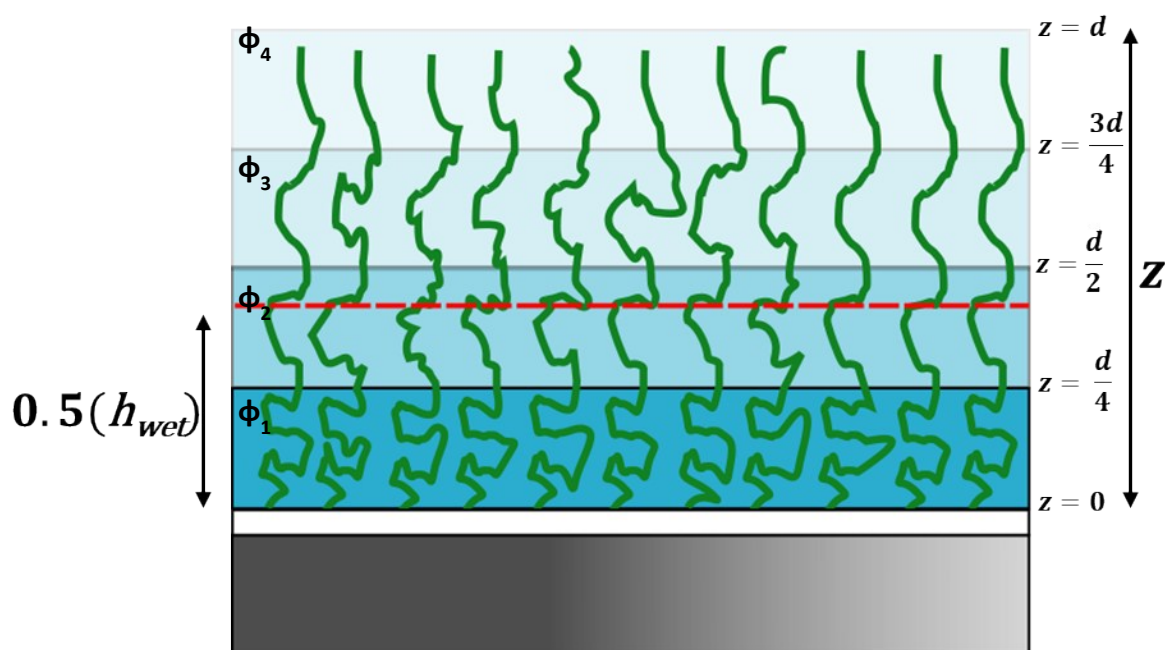

**Figure S1:** A schematic diagram of the ellipsometric model used for polymer brushes swollen in water. Each layer ( $z$ ) is equal in thickness but has a different density of polymer ( $\phi$ ) within it. These values can be used to calculate the brush thickness ( $h_{wet}$ ) of polymer within the solution using Eq. 1. The equations used to derive the wet thickness can be found in the experimental section.

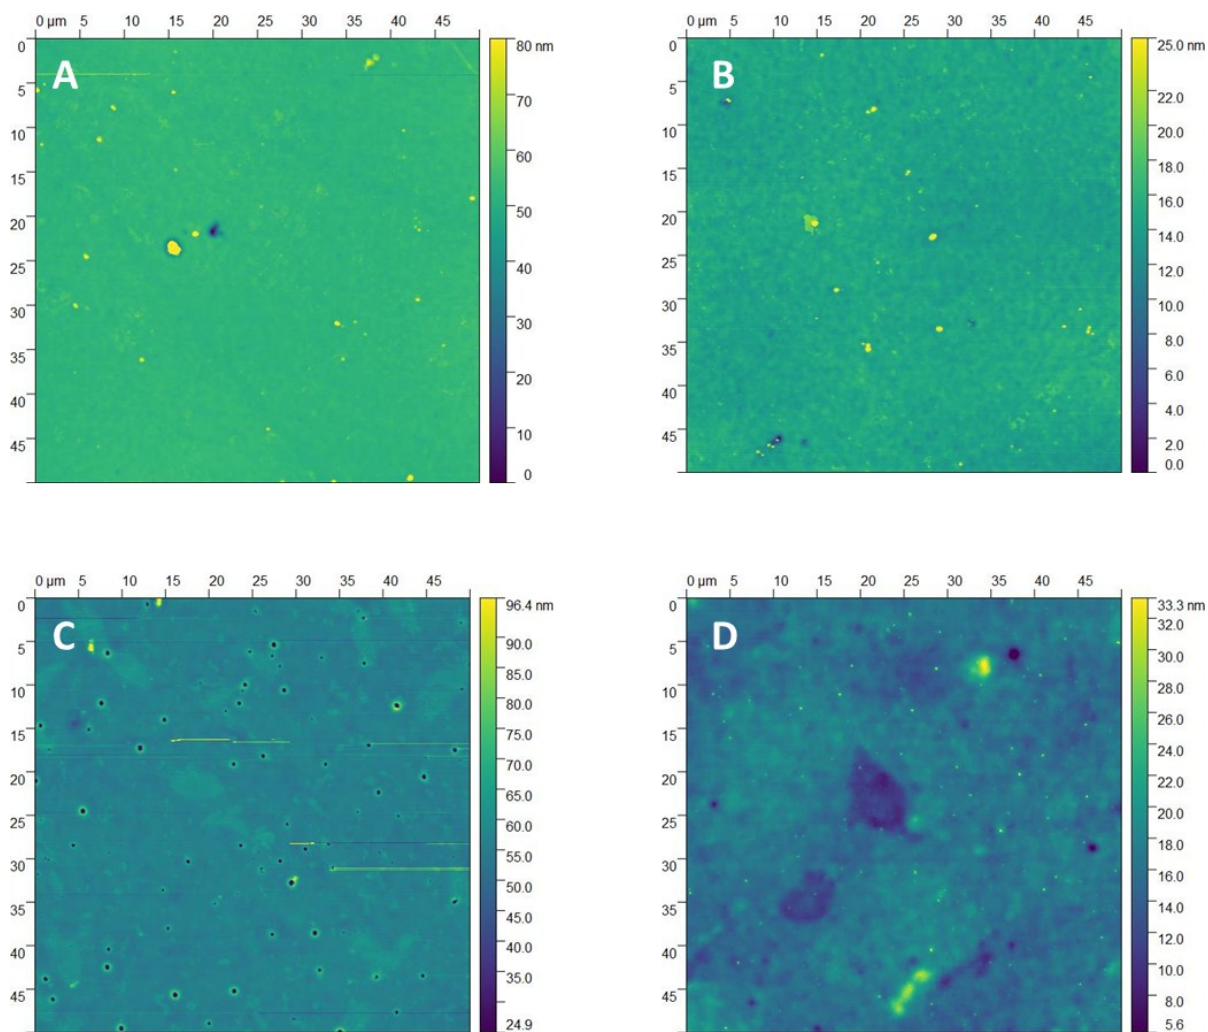

**Figure S2:** Representative AFM images taken over a  $2500 \mu\text{m}^2$  area to gather data for both the average roughness and root mean square roughness, shown in Table 3.1, for samples (A) CuBr<sub>2</sub> catalyst source in deionised water, (B) CuBr<sub>2</sub> catalyst source in tap water, (C) Copper wire catalyst source in deionised water and (D) Copper wire catalyst source in tap water.

(A)

**N<sub>2</sub> atmosphere  
Low viscosity**

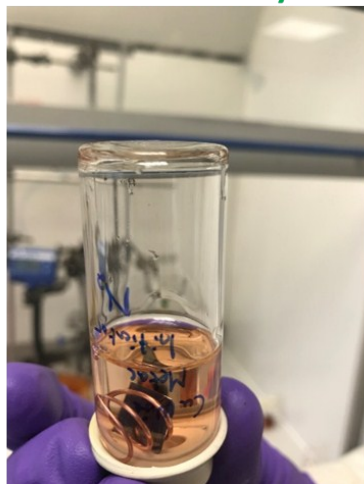

(B)

**Ambient  
atmosphere  
High viscosity**

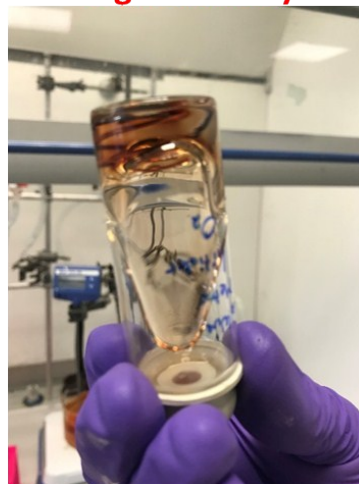

**Figure S3:** Images show the difference in viscosity of the monomer solution after 24 hours for (A) a solution degassed with nitrogen and left under nitrogen pressure and (B) a solution that was not degassed and left in ambient conditions.

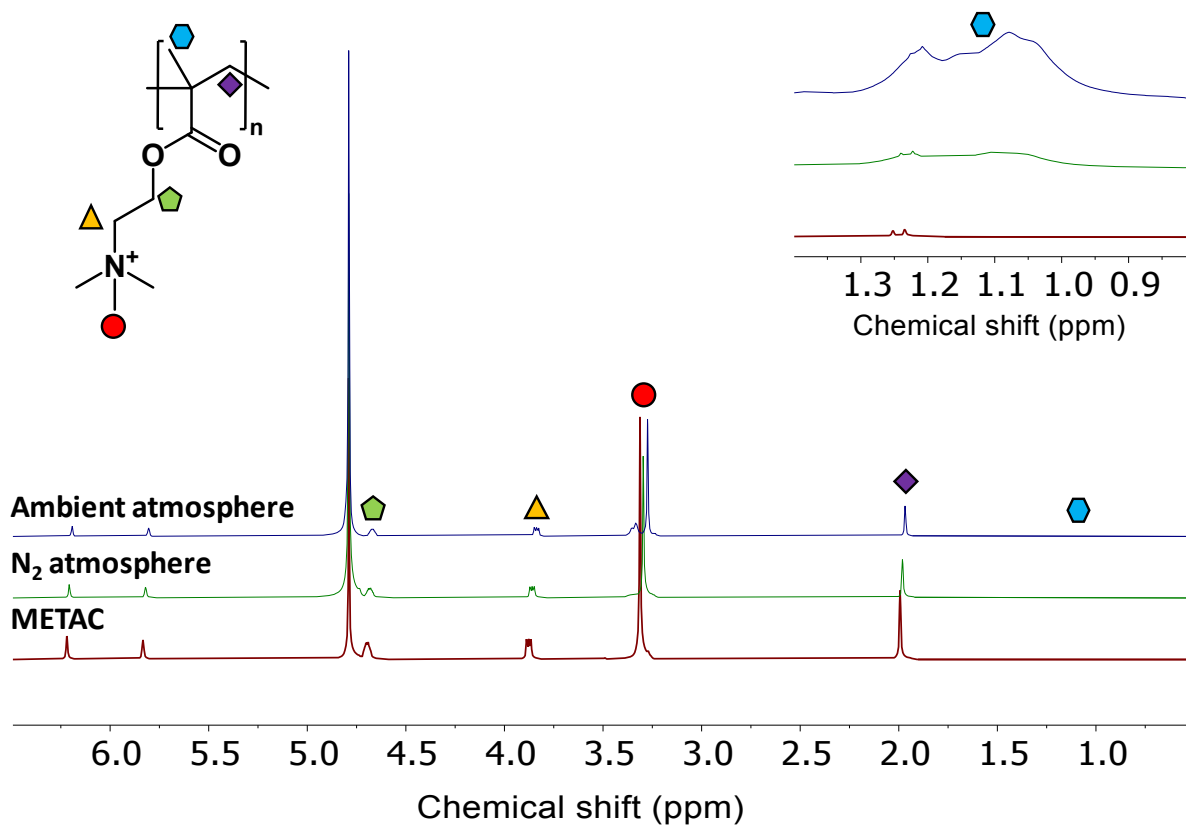

**Figure S4:**  $^1\text{H}$  NMR spectra of METAC monomer solution taken after 24 hours. The METAC solution was mixed with BPY, Ascorbic acid and added to tubes that contained 10 cm of copper wire. A broad peak is observed at 1.0 to 1.3 indicative of polymerisation due to a Fenton-type reaction. A control of METAC monomer is shown with no polymer peak.
